# Supplementary material for: NDP52 acts as a redox sensor in PINK1/Parkin‐mediated mitophagy
Source: PubMed Central journal article supplement (PMC9975939; doi:10.15252/embj.2022111372), 2022-12-14
Supplement: EMBJ-42-e111372-s008.pdf [file EMBJ-42-e111372-s008.pdf]

## **NDP52 acts as a redox sensor in PINK1/Parkin-mediated mitophagy**

Tetsushi Kataura, Elsje G. Otten, Yoana Rabanal-Ruiz, Elias Adriaenssens, Francesca Urselli, Filippo Scialo, Lanyu Fan, Graham R. Smith, Xingxiang Chen, Wyatt W. Yue, Agnieszka K. Bronowska, William M. Dawson, Bernadette Carroll, Sascha Martens, Michael Lazarou, Viktor I. Korolchuk

### **Appendix Contents**

|                    |        |
|--------------------|--------|
| Appendix Figure S1 | page 1 |
| Appendix Figure S2 | page 2 |
| Appendix Figure S3 | page 3 |
| Appendix Table S1  | page 4 |
| Appendix Table S2  | page 5 |
| Appendix Table S3  | page 6 |
| Appendix Table S4  | page 7 |

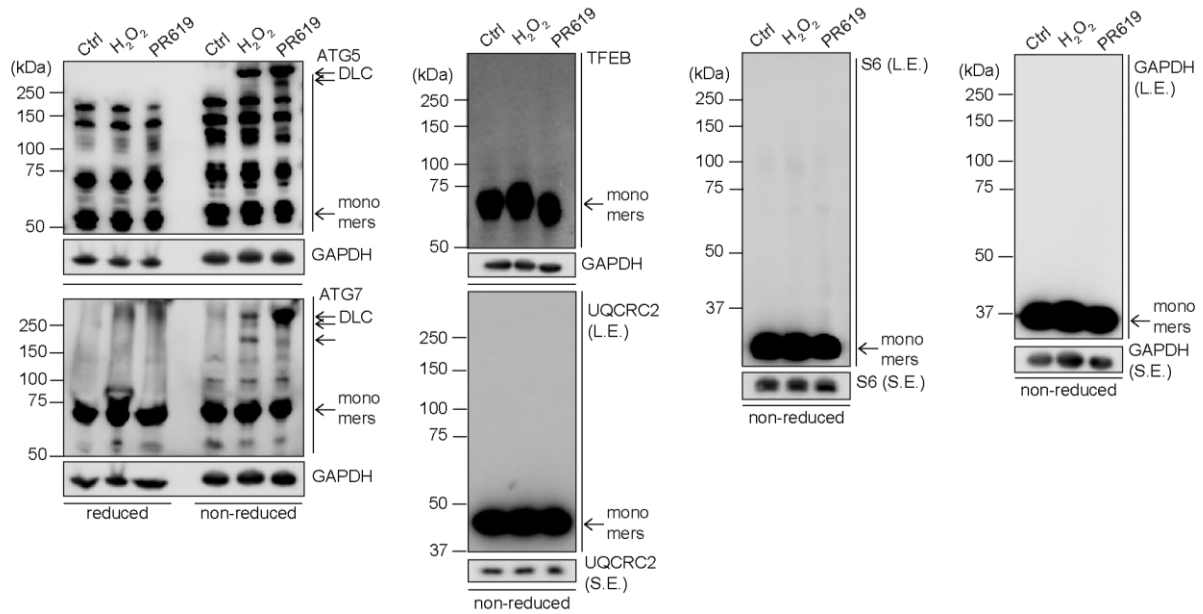

**Appendix Figure S1. DLC formation of autophagy and non-autophagy proteins**

HeLa cells were treated with H<sub>2</sub>O<sub>2</sub> (5 mM, 1 min) or PR-619 (10 μM, 10 min) and analysed by immunoblotting for the indicated endogenous proteins in either reducing (2.5% β-mE) or non-reducing conditions. L.E., long exposure; S.E., short exposure.

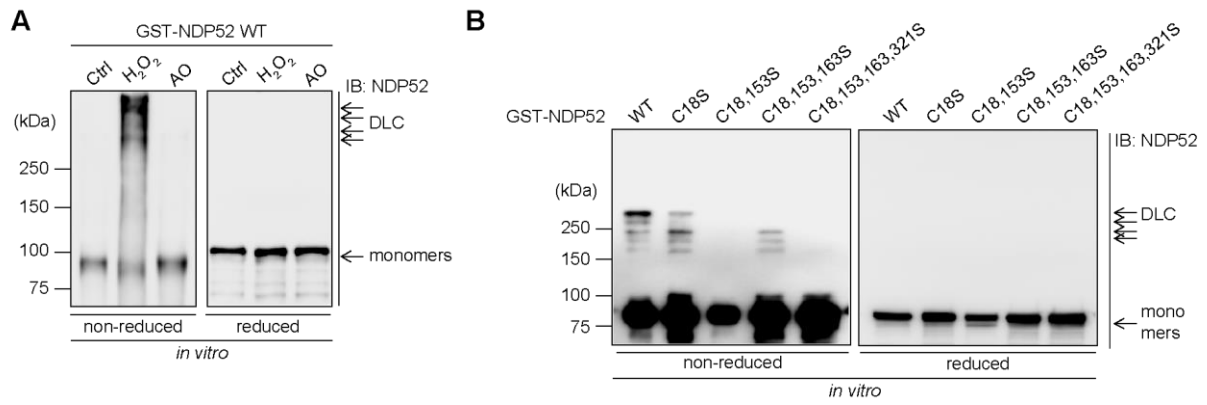

**Appendix Figure S2. Recombinant NDP52 protein is oxidised by H<sub>2</sub>O<sub>2</sub> but not by antimycin and oligomycin**

**A, B** Recombinant GST-NDP52 WT (A, B) and GST-NDP52 mutants as indicated (B) were exposed with 4 μM / 10 μM AO for 3 h (A) or 5 mM H<sub>2</sub>O<sub>2</sub> for 5 min (A, B) and analysed by immunoblotting in either reducing (2.5% β-mE) or non-reducing conditions.

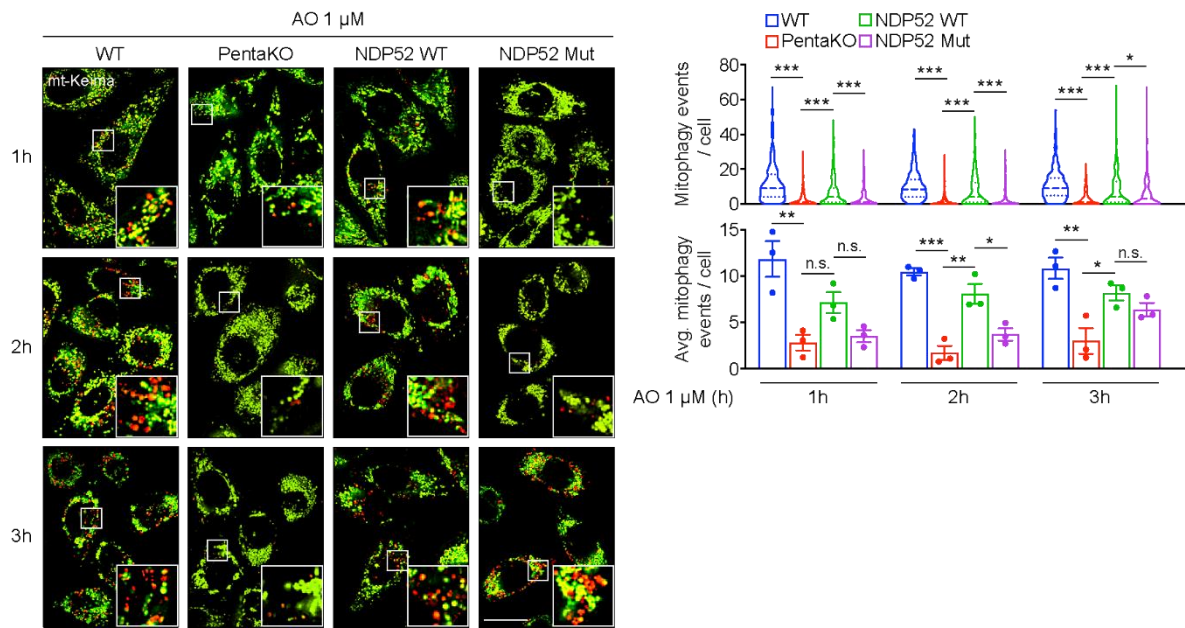

### Appendix Figure S3. Activation of mitophagy by low dose of AO

Fluorescence microscopy images and quantification of mitophagy of HeLa WT, PentaKO + empty vector, PentaKO + NDP52 WT or NDP52 Mut cells stably expressing YFP-Parkin and mt-mKeima were treated with 1  $\mu$ M / 1  $\mu$ M AO for the indicated times. Data are mean  $\pm$  s.e.m. or displayed as cell popular violin plots. *P* values were calculated by one-way ANOVA followed by Sidak test on three independent experiments. \*,  $p < 0.05$ ; \*\*,  $p < 0.01$ ; \*\*\*,  $p < 0.001$ ; ns (non-significant). Scale bars: 20  $\mu$ m.

**Appendix Table S1. Primers used to clone FLAG-NDP52 into pDEST26 vector**

| <b>Primer</b>              | <b>Sequence (5'-3')</b>                                |
|----------------------------|--------------------------------------------------------|
| His-pDEST26-FLAG-NDP52 FWD | TGTTCTGCCACTCTCTCTGATTGATCGCGTGCATGCGACGTCA            |
| His-pDEST26-FLAG-NDP52 REV | TCGTCGTCCTTGTAGTCGCCGTGATGGTGATGGTGATGGTAGTACGCCATGGTC |
| FLAG-NDP52-pDEST26 FWD     | ACCATCACCATCACCATCACGGCGACTACAAGGACGACGACGACA          |
| FLAG-NDP52-pDEST26 REV     | CGTCGCATGCACGCGATCAATCAGAGAGAGTGGCAGAACACGTGGTCTTC     |

**Appendix Table S2. Primers used for NDP52 mutagenesis (Cys to Ala)**

| <b>Primer</b>   | <b>Sequence (5'-3')</b>                            |
|-----------------|----------------------------------------------------|
| NDP52 C18A FWD  | AGCTGTCTTGCTGGATCACGCTCATTCTCTCAGGTCATC            |
| NDP52 C18A REV  | GATGACCTGAGAGAAATGAGCGTGATCCAGCAAGACAGCT           |
| NDP52 C40A FWD  | GTGAAGGTATAATGAGCTGTGACGTCCCCTCCAGGGATG            |
| NDP52 C40A REV  | CATCCCTGGAGGGGACGTCACAGCTCATTATACCTTCAC            |
| NDP52 C108A FWD | CACCATCCTCATCCACATAGGCCGAACTGGTAATACTCATCAT        |
| NDP52 C108A REV | ATGATGAGTATTACCAGTTCGCCTATGTGGATGAGGATGGTG         |
| NDP52 C153A FWD | CAGCTCCTGGTTTTCTTTGGCAAGCTCCTTGTTGTGCTGC           |
| NDP52 C153A REV | GCAGCACAACAAGGAGCTTGCCAAAGAAAACCAGGAGCTG           |
| NDP52 C163A FWD | CTTCTGGAGGCTGATAGCGCTGTCCTTCAGCTCC                 |
| NDP52 C163A REV | GGAGCTGAAGGACAGCGCTATCAGCCTCCAGAAG                 |
| NDP52 C321A FWD | GTCTCTGCAGAGCATTAGCTATAATTTTCGTTCTCACTCAGTCTTTTTGA |
| NDP52 C321A REV | TCAAAAAGACTGAGTGAGAACGAAATTATAGCTAATGCTCTGCAGAGAC  |
| NDP52 C397A FWD | CTTTGCAGATAGGGGCTTTCTTGATGGAGAGCGGGCT              |
| NDP52 C397A REV | AGCCCGCTCTCCATCAAGAAAGCCCCTATCTGCAAAG              |
| NDP52 C400A FWD | ATCACAAATATCATCTGCTTTGGCGATAGGGCATTCTTGATGGAG      |
| NDP52 C400A REV | CTCCATCAAGAAATGCCCTATCGCCAAAGCAGATGATATTTGTGAT     |
| NDP52 C406A FWD | CCAAGGTGTGATCAGCAATATCATCTGCTTTGCAGATAGGGCA        |
| NDP52 C406A REV | TGCCCTATCTGCAAAGCAGATGATATTGCTGATCACACCTTGG        |
| NDP52 C419A FWD | CACAAATTGGACAATTGAAAGCAAGGGGCTGCATCTGCTGT          |
| NDP52 C419A REV | ACAGCAGATGCAGCCCCTTGCTTTCAATTGTCCAATTTGTG          |

**Appendix Table S3. Primers used to clone NDP52 and OPTN into pLENTI6/V5-DEST vector**

| <b>Primer</b>        | <b>Sequence (5'-3')</b>                     |
|----------------------|---------------------------------------------|
| His-FLAG-pLENTI6 FWD | TCGAGTCTAGAGGGCCCGCGTT                      |
| His-FLAG-pLENTI6 REV | T GCGGCCGCTGCCCATCTTGT                      |
| NDP52pLENTI6 FWD     | ACAAGATGGGCAGCGGCCGCATGGAGGAGACCATCAAAGATCC |
| NDP52pLENTI6 REV     | CGCGGGCCCTCTAGACTCGATCAGAGAGAGTGGCAGAACACG  |

**Appendix Table S4. Primers used for NDP52 mutagenesis (Cys to Ser)**

| <b>Primer</b>   | <b>Sequence (5'-3')</b>                      |
|-----------------|----------------------------------------------|
| NDP52 C18S FWD  | CTGTCTTGCTGGATCACAGTCATTTCTCTCAGGTC          |
| NDP52 C18S REV  | GACCTGAGAGAAATGACTGTGATCCAGCAAGACAG          |
| NDP52 C153S FWD | CCTGGTTTTCTTTGCTAAGCTCCTTGTTGTGCTGC          |
| NDP52 C153S REV | GCAGCACAACAAGGAGCTTAGCAAAGAAAACCAGG          |
| NDP52 C163S FWD | TCTGGAGGCTGATACTGCTGTCCTTCAGCTC              |
| NDP52 C163S REV | GAGCTGAAGGACAGCAGTATCAGCCTCCAGA              |
| NDP52 C321S FWD | CTCTGCAGAGCATTACTTATAATTTTCGTTCTCACTCAGTCTTT |
| NDP52 C321S REV | AAAGACTGAGTGAGAACGAAATTATAAGTAATGCTCTGCAGAG  |
